# Supplementary material for: Multifactor colorimetric analysis on pH-indicator papers: an optimized approach for direct determination of ambient aerosol pH
Source: Copernicus journal article supplement (doi:10.5194/amt-13-6053-2020), 2020-11-13
Supplement: Supplementary file 1 [file amt-13-6053-2020-supplement.pdf]

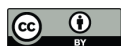

*Supplement of*

**Multifactor colorimetric analysis on pH-indicator papers:  
an optimized approach for direct determination  
of ambient aerosol pH**

**Guo Li et al.**

*Correspondence to:* Hang Su ([h.su@mpic.de](mailto:h.su@mpic.de)) and Yafang Cheng ([yafang.cheng@mpic.de](mailto:yafang.cheng@mpic.de))

The copyright of individual parts of the supplement might differ from the CC BY 4.0 License.

**Table S1.** pH-indicator papers used in this study.

| Type Nr.<br>(classified in this work) | pH Range   | Note                                                                                                           |
|---------------------------------------|------------|----------------------------------------------------------------------------------------------------------------|
| Type I                                | 0.0 – 2.5  |                                                                                                                |
| Type II                               | 2.5 – 4.5  |                                                                                                                |
| Type III                              | 4.0 – 7.0  |                                                                                                                |
| Type IV                               | 0.5 – 5.5  | Model and producer for the Type V pH<br>paper: Hydrion® Brilliant pH dip stiks,<br>Lot Nr. 3110, Sigma-Aldrich |
| Type V                                | 0.0 – 6.0  |                                                                                                                |
| Type VI                               | 0.0 – 5.0  |                                                                                                                |
| Type VII                              | 1.0 – 11.0 |                                                                                                                |
| Type VIII                             | 1.0 – 14.0 |                                                                                                                |
| Type IX                               | 0.0 – 14.0 |                                                                                                                |

**Table S2.** Detailed information about the buffer solutions used in this study.

| Self-prepared Buffer Solutions |                 | Purchased Buffer Solutions      |                                |                 |                                |
|--------------------------------|-----------------|---------------------------------|--------------------------------|-----------------|--------------------------------|
| Measured pH value <sup>a</sup> | SD <sup>b</sup> | Specified pH value <sup>c</sup> | Measured pH value <sup>a</sup> | SD <sup>b</sup> | Manufacturer                   |
| 0.03                           | 0.06            | 1.00                            | 1.00                           | 0.042           | Carl Roth GmbH + Co. KG        |
| 0.61                           | 0.043           | 1.68                            | 1.66                           | 0.036           | VWR CHEMICALS                  |
| 2.48                           | 0.025           | 2.00                            | 1.99                           | 0.045           | Fisher Scientific U.K. Limited |
| 2.83                           | 0.025           | 3.00                            | 2.99                           | 0.045           | neoFroxx GmbH                  |
| 3.58                           | 0.026           | 4.00                            | 4.00                           | 0.042           | neoFroxx GmbH                  |
| 4.38                           | 0.029           | 5.00                            | 5.01                           | 0.045           | Fisher Scientific U.K. Limited |
| 5.50                           | 0.029           | 6.00                            | 6.01                           | 0.042           | Fisher Scientific U.K. Limited |
| 6.46                           | 0.025           | 7.00                            | 7.00                           | 0.042           | Fisher Scientific U.K. Limited |

a: averaged pH values measured by the pH meter; b: standard deviations of three replicate pH measurements by the pH meter; c: pH values specified on the purchased buffer solution bottles.

**Table S3.** Composition of the salt systems used for interference check for different types of pH indicator papers.

| Inorganic Acid Systems                                                          | Organic Acid Systems                                                                          | Inorganic + Organic Acids Systems                                                                                             |
|---------------------------------------------------------------------------------|-----------------------------------------------------------------------------------------------|-------------------------------------------------------------------------------------------------------------------------------|
| MgSO <sub>4</sub> -H <sub>2</sub> SO <sub>4</sub>                               | MgSO <sub>4</sub> -C <sub>2</sub> H <sub>2</sub> O <sub>4</sub>                               | MgSO <sub>4</sub> -H <sub>2</sub> SO <sub>4</sub> -C <sub>2</sub> H <sub>2</sub> O <sub>4</sub>                               |
| Na <sub>2</sub> CO <sub>3</sub> -HCl                                            | Na <sub>2</sub> CO <sub>3</sub> -C <sub>2</sub> H <sub>2</sub> O <sub>4</sub>                 | Na <sub>2</sub> CO <sub>3</sub> -HCl-C <sub>2</sub> H <sub>2</sub> O <sub>4</sub>                                             |
| NaNO <sub>3</sub> -HNO <sub>3</sub>                                             | NaNO <sub>3</sub> -C <sub>2</sub> H <sub>2</sub> O <sub>4</sub>                               | NaNO <sub>3</sub> -HNO <sub>3</sub> -C <sub>2</sub> H <sub>2</sub> O <sub>4</sub>                                             |
| Na <sub>2</sub> SO <sub>4</sub> -H <sub>2</sub> SO <sub>4</sub>                 | Na <sub>2</sub> SO <sub>4</sub> -C <sub>2</sub> H <sub>2</sub> O <sub>4</sub>                 | Na <sub>2</sub> SO <sub>4</sub> -H <sub>2</sub> SO <sub>4</sub> -C <sub>2</sub> H <sub>2</sub> O <sub>4</sub>                 |
| NH <sub>4</sub> NO <sub>3</sub> -HNO <sub>3</sub>                               | NH <sub>4</sub> NO <sub>3</sub> -C <sub>2</sub> H <sub>2</sub> O <sub>4</sub>                 | NH <sub>4</sub> NO <sub>3</sub> -HNO <sub>3</sub> -C <sub>2</sub> H <sub>2</sub> O <sub>4</sub>                               |
| (NH <sub>4</sub> ) <sub>2</sub> SO <sub>4</sub> -H <sub>2</sub> SO <sub>4</sub> | (NH <sub>4</sub> ) <sub>2</sub> SO <sub>4</sub> -C <sub>2</sub> H <sub>2</sub> O <sub>4</sub> | (NH <sub>4</sub> ) <sub>2</sub> SO <sub>4</sub> -H <sub>2</sub> SO <sub>4</sub> -C <sub>2</sub> H <sub>2</sub> O <sub>4</sub> |
| Na <sub>2</sub> HPO <sub>4</sub> -H <sub>2</sub> SO <sub>4</sub>                | Na <sub>2</sub> HPO <sub>4</sub> -C <sub>6</sub> H <sub>8</sub> O <sub>7</sub>                | NH <sub>4</sub> NO <sub>3</sub> -HNO <sub>3</sub> -C <sub>3</sub> H <sub>4</sub> O <sub>4</sub>                               |
|                                                                                 |                                                                                               | (NH <sub>4</sub> ) <sub>2</sub> SO <sub>4</sub> -H <sub>2</sub> SO <sub>4</sub> -C <sub>3</sub> H <sub>4</sub> O <sub>4</sub> |

**Table S4.** Results of  $t$ -test on the predicted pH ( $pH_{\text{predict}}$ ) of lab-generated aerosols with and without the coexistence of black carbon (BC).

| $pH_{\text{reference}}$<br>(with BC vs.<br>without BC) | $t$ -test results |       |      |                  |     |       |
|--------------------------------------------------------|-------------------|-------|------|------------------|-----|-------|
|                                                        | $t$               | $sd$  | $df$ | $ci$             | $h$ | $p$   |
| 1.05 vs. 1.30                                          | 1.993             | 0.247 | 28   | (-0.005, 0.365)  | 0   | 0.056 |
| 2.08 vs. 2.31                                          | 12.429            | 0.068 | 28   | (0.257, 0.358)   | 1   | 0     |
| 3.35 vs. 3.44                                          | 5.164             | 0.065 | 28   | (0.073, 0.170)   | 1   | 0     |
| 4.24 vs. 4.50                                          | -0.559            | 0.080 | 28   | (-0.076, 0.044)  | 0   | 0.581 |
| 5.56 vs. 5.75                                          | -3.442            | 0.051 | 28   | (-0.103, -0.026) | 1   | 0.002 |

$t$ : value of the test statistic;  $sd$ : pooled estimate of the population standard deviation;  $df$ : degree of freedom;  $ci$ : confidence interval (95%);  $h$ : hypothesis test result;  $p$ : probability (p-) value; NA: no available data. The listed results are from two-sample  $t$ -test using a Matlab software. For the  $t$ -test, the null hypothesis is set as the tested two samples have equal means. The hypothesis test result  $h$  returns as 0 or 1:  $h = 0$  indicates the  $t$ -test doesn't reject the null hypothesis and  $h = 1$  otherwise. The p-values of over 0.1 suggest there is no evidence that the null hypothesis doesn't hold, and the p-values between 0.01 and 0.05 indicate there is moderately strong evidence that the null hypothesis doesn't hold (see <http://www-ist.massey.ac.nz/dstirlin/cast/cast/htestpvalue/testpvalue4.html>). Note that to avoid the influence of differences in  $pH_{\text{reference}}$  at each pH step for the two types of aerosols, the  $pH_{\text{predict}}$  weighted by  $pH_{\text{reference}}$  are used for  $t$ -test.

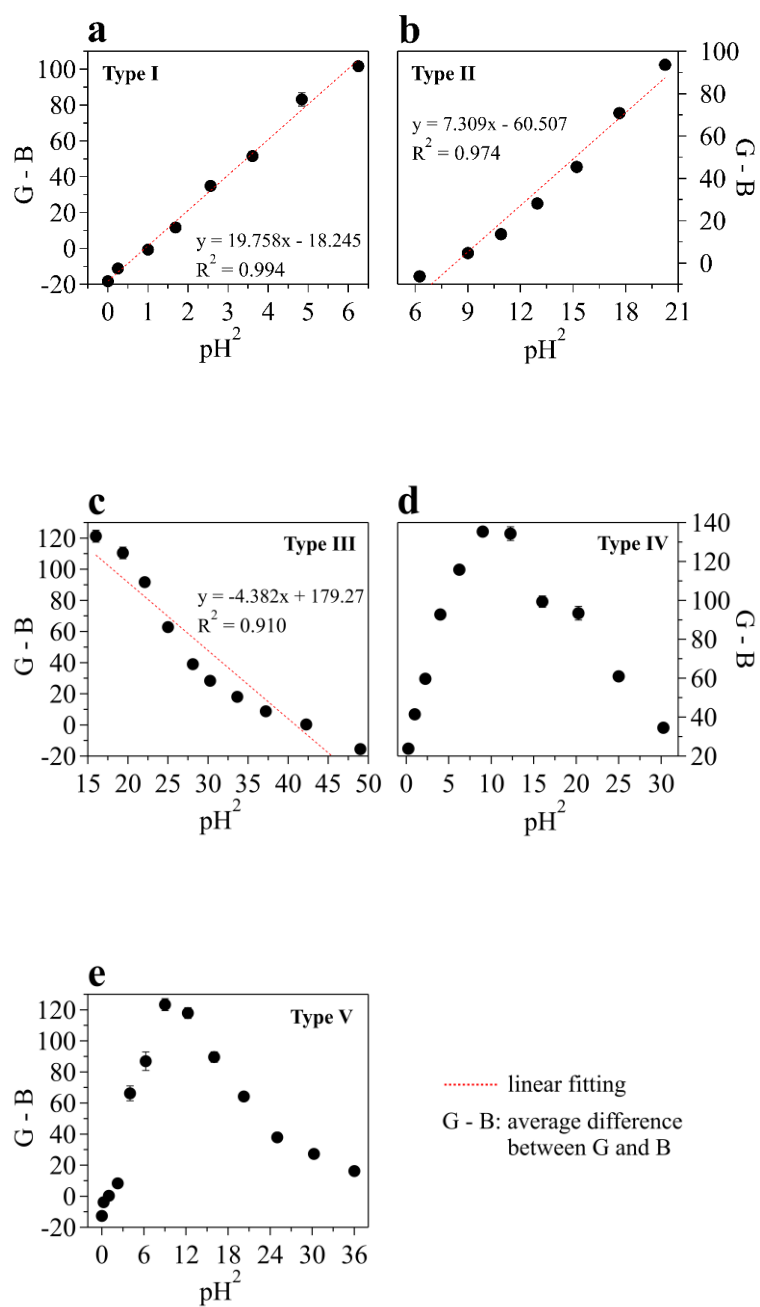

**Figure S1.** Relationship between the average difference of G and B ( $G - B$ ) and  $pH^2$ , derived from the color charts of five different pH papers: Type I: 0 – 2.5, Type II: 2.5 – 4.5, Type III: 4.0 – 7.0, Type IV: 0.5 – 5.5 and Type V: 0 – 6.0 (summarized in Table S1).

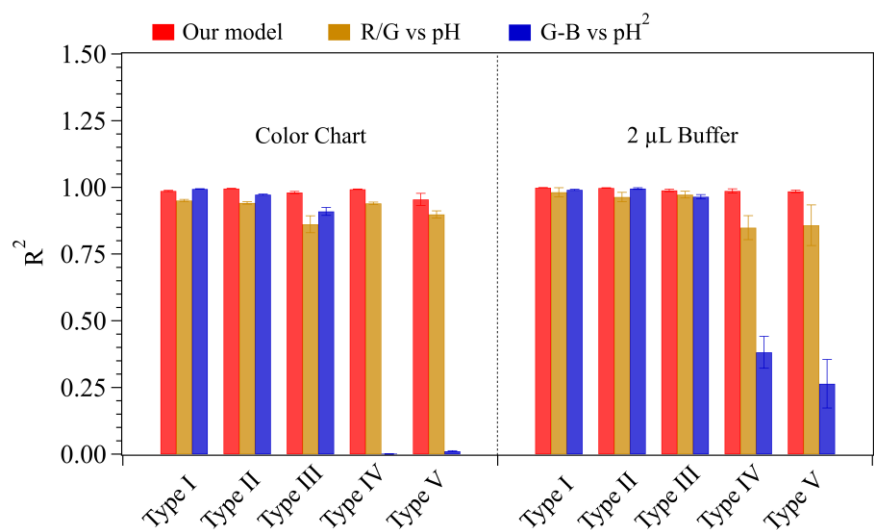

**Figure S2.** Comparison of the established linear correlation ( $R^2$ ) using different RGB models for the first five types of pH papers adopted in this study. For each type, the comparison is made for its color chart and samples of 2 µL buffers, respectively. The model R/G vs pH was used by Selva Kumar et al. (2018) and G-B vs pH<sup>2</sup> by Craig et al. (2018). The error bars represent the standard deviation of five to six replicate experiments.

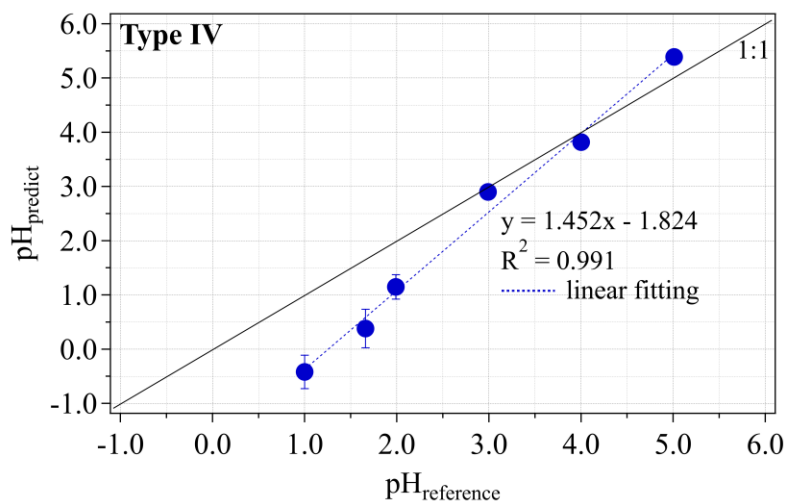

**Figure S3.**  $\text{pH}_{\text{predict}}$  versus  $\text{pH}_{\text{reference}}$  for 2  $\mu\text{L}$  buffer samples on the type IV pH paper. The  $\text{pH}_{\text{predict}}$  are calculated using the coefficient vector  $[a, b, c]$  derived from regression analysis on the color chart. The error bars represent the standard deviation of five replicate experiments.



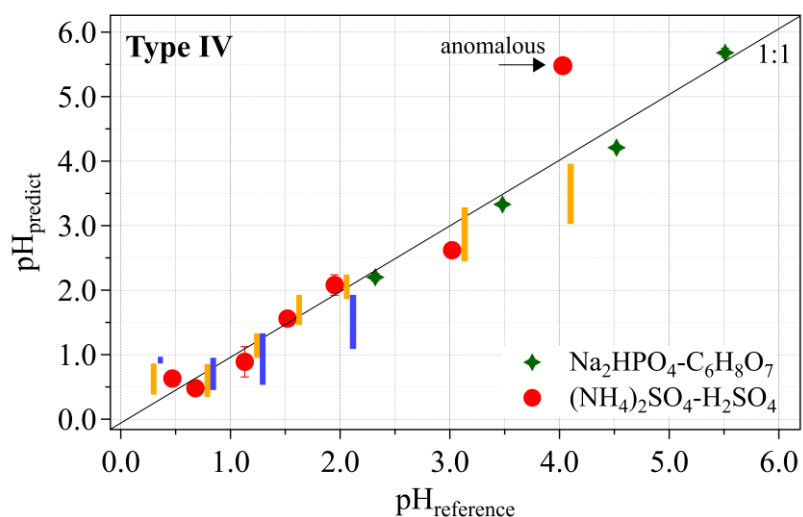

**Figure S4.** Estimation of samples pH using the type IV pH paper. The adopted samples include a series of 2  $\mu\text{L}$  lab-prepared aerosol surrogates ( $(\text{NH}_4)_2\text{SO}_4\text{-H}_2\text{SO}_4$ , red dot) and self-prepared buffers ( $\text{Na}_2\text{HPO}_4\text{-C}_6\text{H}_8\text{O}_7$ , green star).  $\text{pH}_{\text{predict}}$  are calculated with the averaged coefficient vector  $[a, b, c]$  derived from the standard buffers from three to six replicate experiments under constant photographing conditions. The error bars represent the standard deviation of three to six replicate experiments. The heights of the orange and blue bars indicate the reported pH ranges measured with pH papers and Raman spectroscopy respectively, for  $(\text{NH}_4)_2\text{SO}_4\text{-H}_2\text{SO}_4$  aerosols with particle sizes larger than 2.5  $\mu\text{m}$  in Craig et al. (2018). Note that, each orange or blue bar has the same  $\text{pH}_{\text{reference}}$  as of the red symbol close to it.

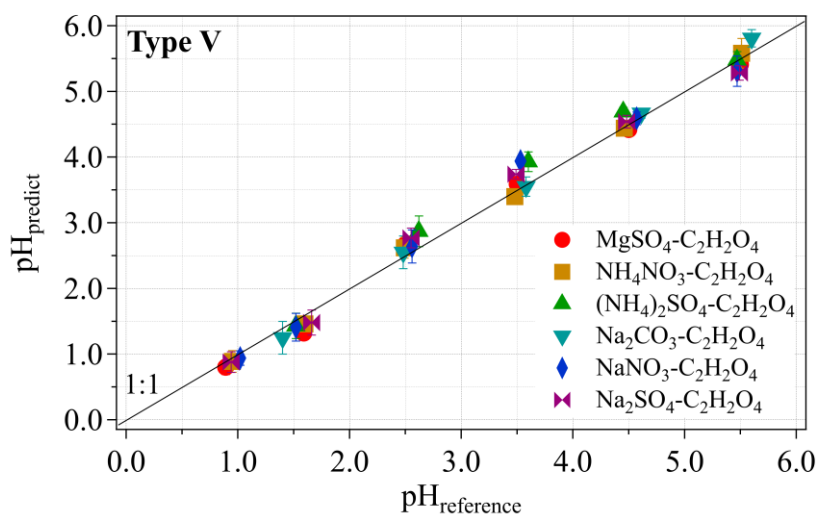

**Figure S5.** pH estimation using the type V pH paper for salt systems with oxalic acid.  $\text{pH}_{\text{predict}}$  are calculated with the averaged coefficient vector  $[a, b, c]$  derived from three replicate calibration experiments with 2  $\mu\text{L}$  standard buffers and under constant photographing conditions. The error bars represent the standard deviation of three to four replicate experiments.

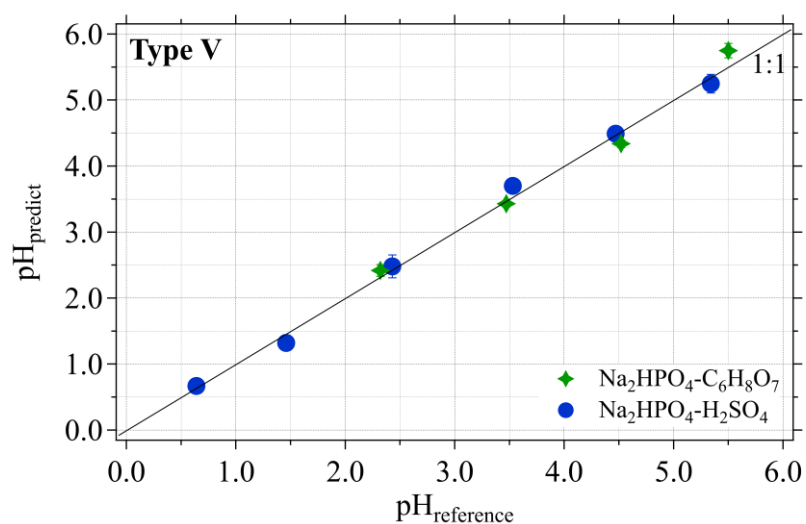

**Figure S6.** pH estimation using the type V pH paper for phosphate systems.  $\text{pH}_{\text{predict}}$  are calculated with the averaged coefficient vector  $[a, b, c]$  derived from three replicate calibration experiments with 2  $\mu\text{L}$  standard buffers and under constant photographing conditions. The error bars represent the standard deviation of three replicate experiments.

### Interference test for different types of pH indicator papers (Type III and VI-IX)

The test includes two steps: Step1 is to check the established linearity between  $\text{pH}_{\text{predict}}$  and  $\text{pH}_{\text{reference}}$  directly with Eqn (5); Step2 is to predict sample pH (with Eqn (4)) using the coefficient vector  $[a, b, c]$  derived from linear regression analyses on standard buffers (i.e. the standard-buffer-calibration method) and is only conducted when the linearity check (in Step1) provides a good linearity with  $R^2 \geq 0.95$ . Note that if the linearity check in Step1 gives a poor linearity ( $R^2 < 0.95$ ), this result is enough (the obtained  $R^2$  in Step1 is always larger than the  $R^2$  in Step2) to demonstrate the tested pH paper is not suitable for pH measurements of atmospheric aerosols due to either its limited ability to achieve accurate pH or potential interferences from various chemical compositions common in aerosols. As shown in Fig. S7, for the Step1 test, poor linearity is found for type III, VI, VII and IX pH papers against different test samples whose pH were measured by a pH bench meter beforehand. Good linearity in Step1 ( $R^2 \geq 0.95$ ), however, cannot guarantee the good applicability of a tested pH paper for aerosol pH estimation and therefore needs to be checked through Step2 to further inspect the effectiveness of the adopted colorimetric method on this specific pH paper type. In Fig. S7, the type VIII pH paper still predicts largely deviated  $\text{pH}_{\text{predict}}$  when  $\text{pH}_{\text{reference}}$  in the range of 4 – 6, even though it presents a good linearity in the Step1 linearity check. All the results demonstrate that these tested pH paper types are not suitable for pH measurement of ambient aerosols.

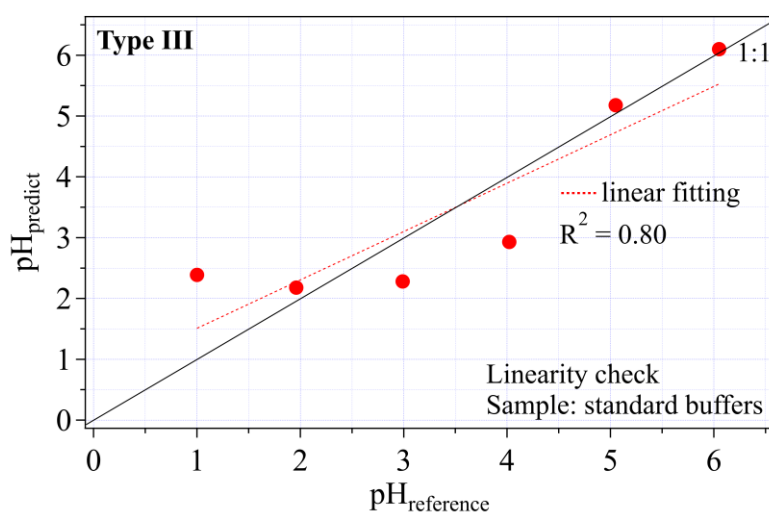

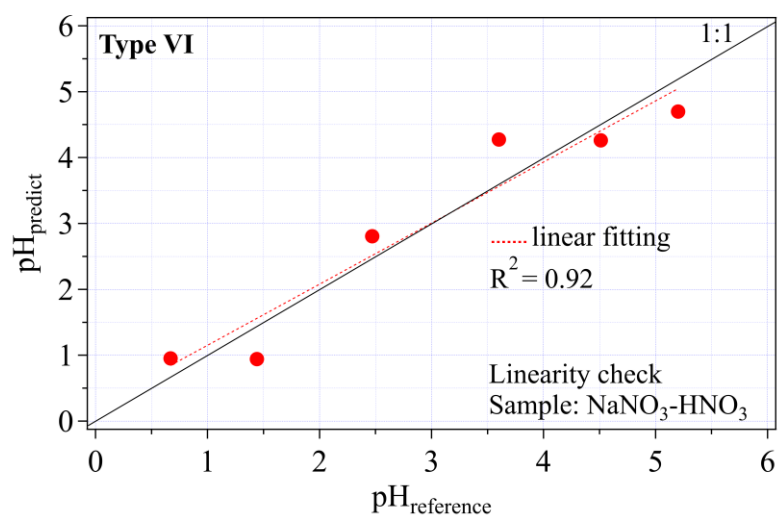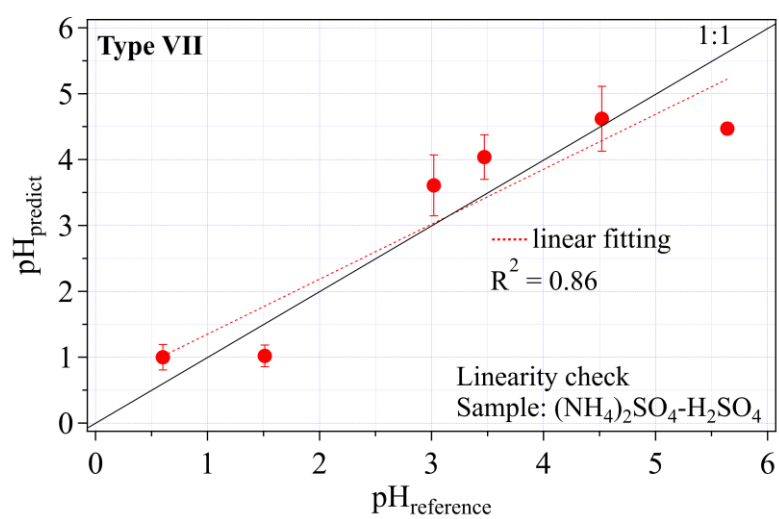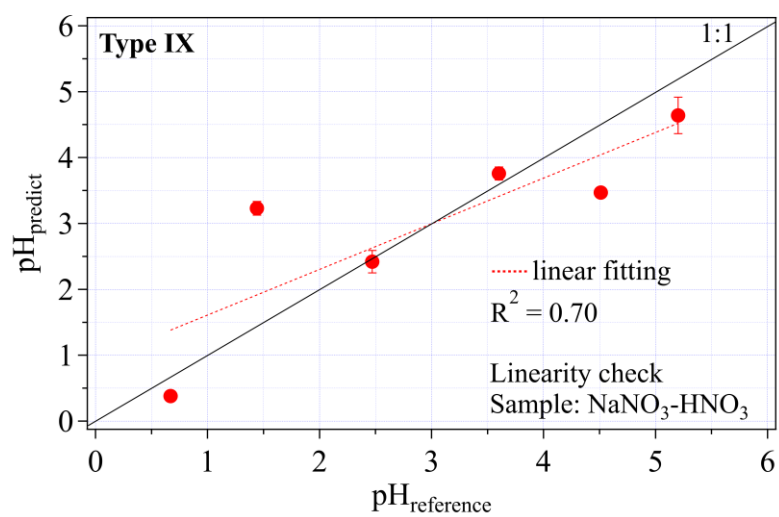

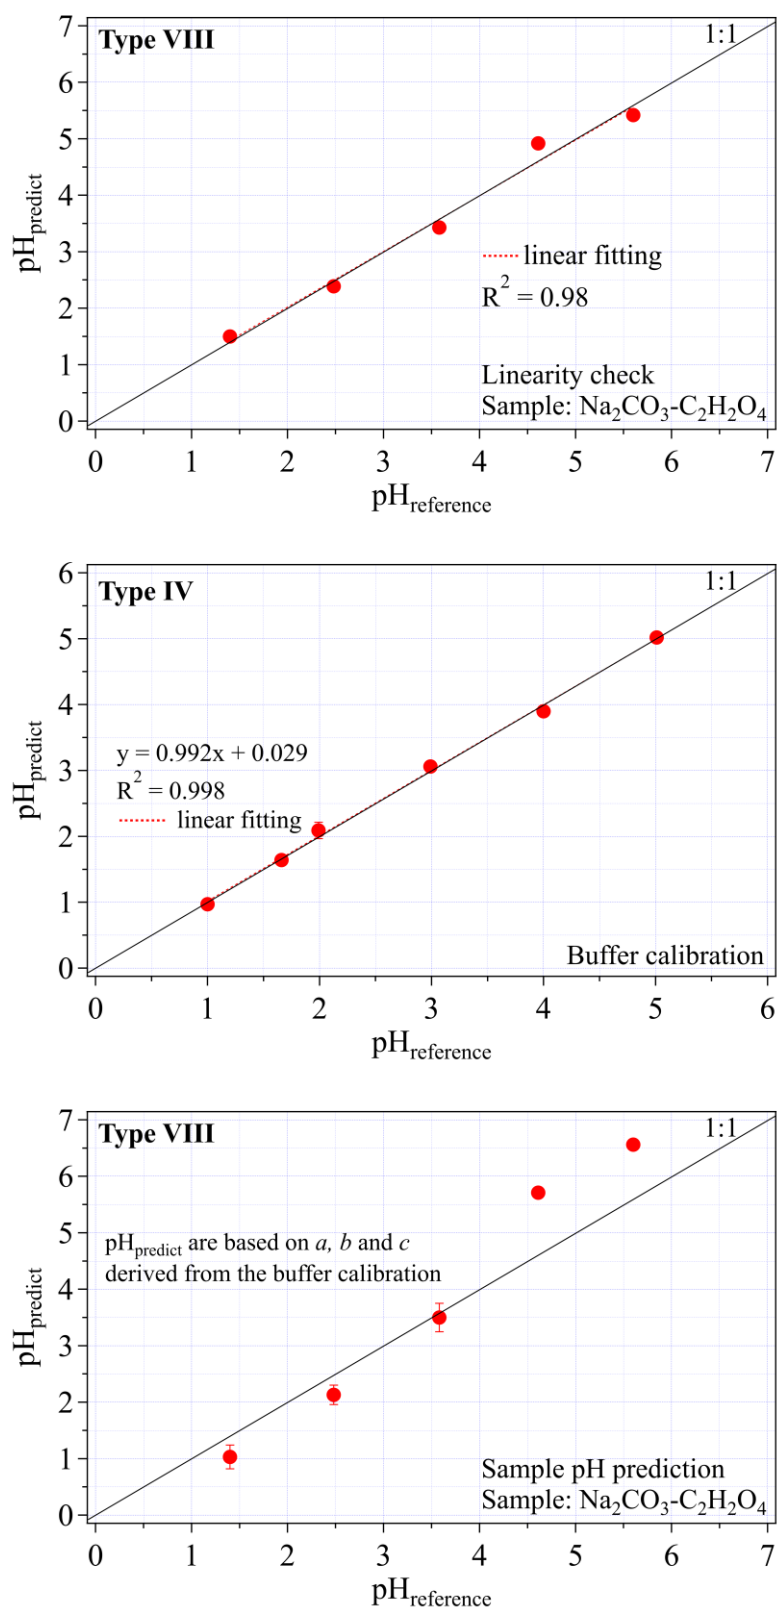

**Figure S7.** Interference check for different types of pH indicator papers through lab-prepared aerosol surrogates (2  $\mu\text{L}$ ). The error bars represent the standard deviation of three to four replicate experiments.

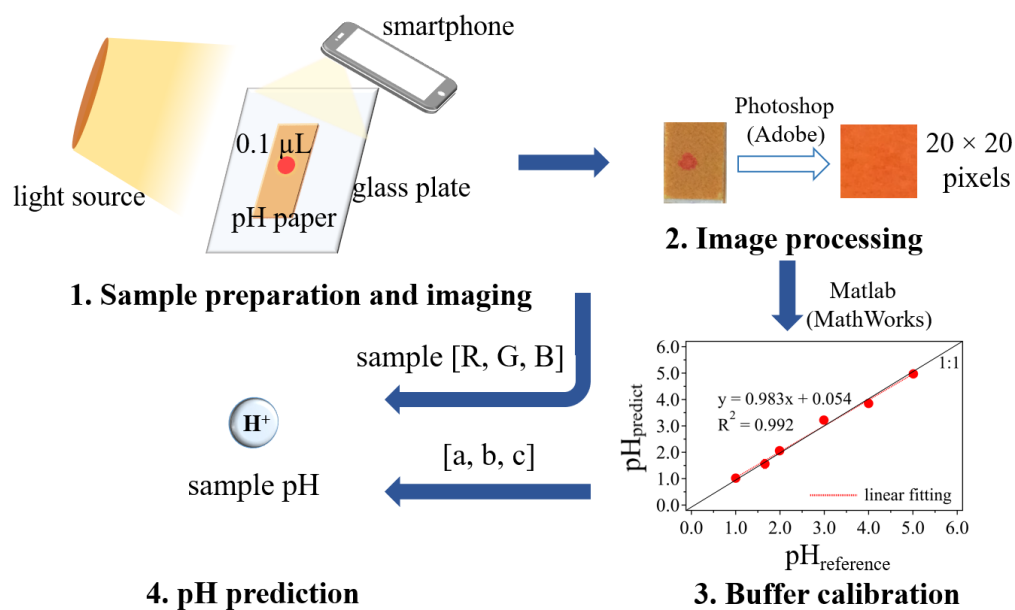

**Figure S8.** Schematic of using the RGB-based colorimetric method for pH estimation of 0.1  $\mu\text{L}$  aerosol samples. Note that when using the buffer calibration results to predict the pH of aerosol samples, the photographing conditions for the samples are the same as those of the buffer calibration.

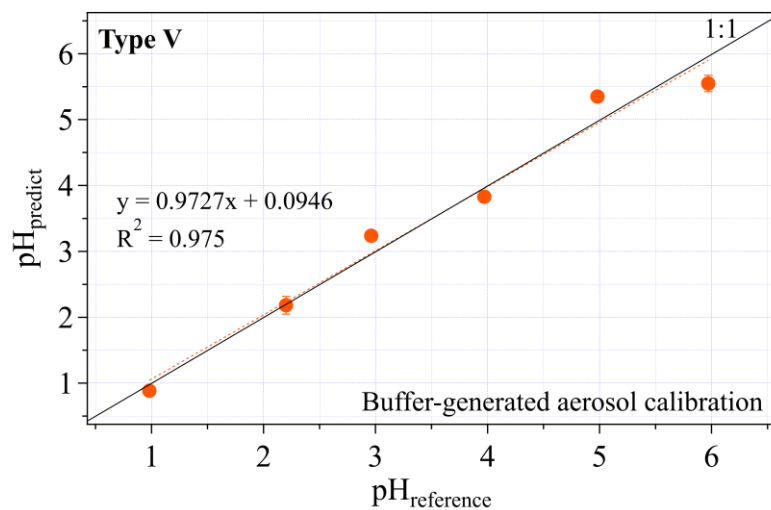

**Figure S9.**  $\text{pH}_{\text{predict}}$  versus  $\text{pH}_{\text{reference}}$  for standard-buffer-generated aerosols collected on pH papers through a custom-made impactor. The error bars represent the standard deviation of three to four replicate experiments.



## References

Craig, R. L., Peterson, P. K., Nandy, L., Lei, Z., Hossain, M. A., Camarena, S., Dodson, R. A., Cook, R. D., Dutcher, C. S., and Ault, A. P.: Direct Determination of Aerosol pH: Size-Resolved Measurements of Submicrometer and Supermicrometer Aqueous Particles, *Analytical Chemistry*, 90, 11232-11239, 10.1021/acs.analchem.8b00586, 2018.

Selva Kumar, R., Kumar, S. K. A., Vijayakrishna, K., Sivaramakrishna, A., Brahmananda Rao, C. V. S., Sivaraman, N., and Sahoo, S. K.: Development of the Smartphone-Assisted Colorimetric Detection of Thorium by Using New Schiff's Base and Its Applications to Real Time Samples, *Inorganic Chemistry*, 57, 15270-15279, 10.1021/acs.inorgchem.8b02564, 2018.
